# Supplementary material
Source: publisher site journal article supplement (https://www.spandidos-publications.com/4414/downloadSupplementary)
Supplement: Supplementary file 1 [file downloadSupplementary]

**Table SI. Sequences of primers (mouse) used for RT-qPCR.**

| Primer         | Forward (5'-3')                    | Reverse (5'-3')                                        |
|----------------|------------------------------------|--------------------------------------------------------|
| iNOS           | GACATTACGACCCCTCCCAC               | GCACATGCAAGGAAGGGAAC                                   |
| TNF- $\alpha$  | TGATCGGTCCCCAAAGGGAT               | TGTCTTTGAGATCCATGCCGT                                  |
| IL-6           | CAACGATGATGCACTTGCAGA              | GTGACTCCAGCTTATCTCTTGGT                                |
| IL-1 $\beta$   | TGCCACCTTTTGACAGTGATG              | AAGGTCCACGGGAAAGACAC                                   |
| Arg1           | AATGAAGAGCTGGCTGGTGT               | CTGGTTGTCAGGGGAGTGTT                                   |
| Retnla         | AGCTGATGGTCCCAGTGAATAC             | GCCACAAGCACACCCAGTAG                                   |
| IL-10          | GTGGAGCAGGTGAAGAGTGA               | TCGGAGAGAGGTACAAACGAG                                  |
| CD206          | CTAACTGGGGTGCTGACGAG               | GGCAGTTGAGGAGGTTTCAGT                                  |
| SOCS1          | GTTGTGGAGGGTGAGATGCC               | AGACACAAGCTGCTACAACCA                                  |
| Notch2         | CAGTGTCGAGGTGGTCAAGAGC             | GTGAATCCTGGAGCACATCGG                                  |
| $\beta$ -actin | TGCTGTCCCTGTATGCCTCTG              | TGATGTCACGCACGATTTC                                    |
| miR-21a-5p     | ACGTTGTGTAGCTTATCAGACTG            | AATGGTTGTTCTCCACACTCTC                                 |
| miR-155-5p     | GCCGAGTTAATGCTAATTGTG              | CTCAACTGGTGTCGTGGA                                     |
| miR-181a-5p    | GCAACATTCAACGCTGTCG                | GTCGTATCCAGTGCAGGGTCCGAGGTA<br>TTCGCACTGGATACGACACTCAC |
| miR-200c-3p    | GCCGGGTAATGATGGAGT                 | GCAGGGTCCGAGGTATTC                                     |
| miR-221-3p     | GTTCGTGGGAGCTACATTGTCTGC           | GTGCAGGGTCCGAGGT                                       |
| miR-429-3p     | ACACTCCAGCTGGGTAATACTGTCT<br>GGTAA | CTCAACTGGTGTCGTGGAGTCGGCAAT<br>TCAGTTGAGACGGTTTT       |
| U6             | GCTTCGGCAGCACATATACTA              | CGAATTTGCGTGTTCATCCTTG                                 |

RT-qPCR, reverse transcription-quantitative PCR; iNOS, inducible nitric oxide synthase; Arg1, arginase 1; Retnla, resistin like alpha; SOCS1, suppressor of cytokine signaling 1.

**Table SII. Sequences of primers (human) used for RT-qPCR.**

| Primer                                                                                                                                                                                                   | Forward (5'-3')          | Reverse (5'-3')         |
|----------------------------------------------------------------------------------------------------------------------------------------------------------------------------------------------------------|--------------------------|-------------------------|
| HLA-DR                                                                                                                                                                                                   | AATGTGGGTGGAGGGGTTCA     | AGAAACGTGGTCTGGTGTCC    |
| MRC-1                                                                                                                                                                                                    | CCATCGAGGAAGAGGTTCCGG    | GGTGGGTTACTCCTTCTGCC    |
| CCL22                                                                                                                                                                                                    | TTACGTCCGTTACCGTCTGC     | CCACGGTCATCAGAGTAGGC    |
| Arg1                                                                                                                                                                                                     | ACTGAGGGTTGACTGACTGGA    | TTCTTCCACCCCTCCTCGTG    |
| IL-6                                                                                                                                                                                                     | TACATCCTCGACGGCATCT      | ACCAGGCAAGTCTCCTCAT     |
| IL-1 $\beta$                                                                                                                                                                                             | GTGGCAATGAGGATGACTTGTTCT | TGTAGTGGTGGTCGGAGATTCCG |
| TNF- $\alpha$                                                                                                                                                                                            | TGGAGCTGGCCGAGGAG        | AGCAGGCAGAAGAGCGTGG     |
| IL-10                                                                                                                                                                                                    | GACTTTAAGGGTTACCTGGGTTG  | TCACATGCGCCTTGATGTCTG   |
| GAPDH                                                                                                                                                                                                    | GGAGTCCACTGGCGTCTTCA     | GTCATGAGTCCTTCCACGATACC |
| RT-qPCR, reverse transcription-quantitative PCR; HLA-DR, major histocompatibility complex, class II, DR beta1; CCL22, C-C motif chemokine ligand 22; MRC-1, mannose receptor C-type 1; Arg1, arginase 1. |                          |                         |
